# Supplementary material for: HLA-DQB1/DRB1 Alleles Associate with Traditional Chinese Medicine Syndrome of Chronic Hepatitis B: A Potential Predictor of Progression
Source: Hindawi journal article supplement (doi:10.1155/2019/8146937), 2019-11-21
Supplement: f1 [file 8146937.f1.pdf]

**Table S1. Diagnostic criteria of KYDS in TCM**

|                                             | Symptomes                                                                                                                                                                                                                                                                                                                                            |
|---------------------------------------------|------------------------------------------------------------------------------------------------------------------------------------------------------------------------------------------------------------------------------------------------------------------------------------------------------------------------------------------------------|
| <b>Presenting symptoms</b>                  | a. soreness and weakness of waist and knees<br>b. chilly, cold limbs, and lacking in strength<br>c. hypaphrodisia                                                                                                                                                                                                                                    |
| <b>Minor symptoms</b>                       | a. pale or dull complexion<br>b. urine frequency or urgency or difficulty, or excessive at night<br>c. loose stool or dawn diarrhea<br>d. male impotentia, prostermia, or sterility. Female dysgenesis, leucorrhea increases, or amenia<br>e. with lightly purple tongue and smooth fur<br>d. with deep thready pulse, especially in the part of chi |
| <b>Criterion of differentiation of KYDS</b> | satisfied with two of the presenting symptoms(the <i>a</i> is necessary), or content with the <i>a</i> of the presenting symptom and two or more of the minor symptoms.                                                                                                                                                                              |

**Table S2. Inclusion and exclusion criteria**

|                           |                                                                                                |
|---------------------------|------------------------------------------------------------------------------------------------|
| <b>Inclusion criteria</b> | a. satisfied with the diagnostic criteria of CHB                                               |
|                           | b. aged between 18-45 years old                                                                |
|                           | c. provided written informed consent for participation                                         |
| <b>Exclusion criteria</b> | a. patients diagnosed with liver cirrhosis, or cancer, or hepatic failure                      |
|                           | b. complicated with Drug-Induced Liver Injury, autoimmune liver disease, alcohol liver disease |
|                           | c. patients with mental illness or inability to cooperate                                      |

**Table S3. Inclusion and exclusion criteria of meta-analysis**

|                           |                                                                                                        |
|---------------------------|--------------------------------------------------------------------------------------------------------|
| <b>Inclusion criteria</b> | a. an independent case control study                                                                   |
|                           | b. relevant genotype frequencies, or odds ratio(OR) and 95% confidence interval(CI) should be reported |
|                           | c. a full text study so that detail information could be acquired                                      |
| <b>Exclusion criteria</b> | a. the control group was not healthy                                                                   |
|                           | b. duplicate publication                                                                               |
|                           | c. China wasn't the study region                                                                       |
|                           | d. materials and methods were not well-described and reliable                                          |

**Table S4. Hardy-Weinberg Equilibrium of *HLA-DQB1*, *HLA-DRB1***

| Locus           | KYDS           |                               |                               |                | NKYDS          |                               |                               |                | HC             |                               |                               |                |
|-----------------|----------------|-------------------------------|-------------------------------|----------------|----------------|-------------------------------|-------------------------------|----------------|----------------|-------------------------------|-------------------------------|----------------|
|                 | N <sup>a</sup> | H <sub>obs</sub> <sup>b</sup> | H <sub>exp</sub> <sup>c</sup> | P <sup>d</sup> | N <sup>a</sup> | H <sub>obs</sub> <sup>b</sup> | H <sub>exp</sub> <sup>c</sup> | P <sup>d</sup> | N <sup>a</sup> | H <sub>obs</sub> <sup>b</sup> | H <sub>exp</sub> <sup>c</sup> | P <sup>d</sup> |
| <i>HLA-DQB1</i> | 28             | 0.8571                        | 0.8578                        | 0.54           | 46             | 0.8478                        | 0.8629                        | 0.95           | 31             | 0.9355                        | 0.8509                        | 0.83           |
| <i>HLA-DRB1</i> | 28             | 0.8929                        | 0.8961                        | 0.44           | 46             | 0.8696                        | 0.8884                        | 0.88           | 31             | 0.9355                        | 0.9344                        | 0.49           |

N<sup>a</sup>, Sample number; H<sub>obs</sub><sup>b</sup>, Observed heterozygosity; H<sub>exp</sub><sup>c</sup>, Expected heterozygosity; P<sup>d</sup>, *P* value
